# Supplementary material for: Sialyl-Tn serves as a potential therapeutic target for ovarian cancer
Source: Springer Nature journal article supplement (doi:10.1186/s13048-024-01397-1), 2024-04-02
Supplement: MOESM1 [file 26934714]

| <b>Cancer Subtype</b> |              |                     |                 |               |
|-----------------------|--------------|---------------------|-----------------|---------------|
| <b>Benign</b>         | <b>Clear</b> | <b>Endometrioid</b> | <b>Mucinous</b> | <b>Serous</b> |
| 146                   | 37           | 29                  | 20              | 188           |

| <b>Cancer Stage</b> |           |            |           |
|---------------------|-----------|------------|-----------|
| <b>I</b>            | <b>II</b> | <b>III</b> | <b>IV</b> |
| 69                  | 35        | 123        | 45        |

| <b>Age Range</b> |              |              |                |
|------------------|--------------|--------------|----------------|
| <b>&lt;30</b>    | <b>30-50</b> | <b>50-70</b> | <b>&gt;=70</b> |
| 9                | 106          | 225          | 80             |
