# Supplementary material for: Sialyl-Tn serves as a potential therapeutic target for ovarian cancer
Source: Springer Nature journal article supplement (doi:10.1186/s13048-024-01397-1), 2024-04-02
Supplement: MOESM2 [file 26934714]

| IHC Score | Code          | Subtype | Serum STn   | CA125 | Grade | Stage |
|-----------|---------------|---------|-------------|-------|-------|-------|
| 3         | LAA1, 66, 153 | Serous  | 2.760704322 | 10853 | 3     | IIIc  |
| 0         | LAA6          | Serous  | 0.026551936 | 604.4 | 3     | IIIc  |
| 2         | LAA16, 171    | Serous  | 0.333990403 | 308   | 3     | IV    |
| 1         | LAA17, 177    | Serous  | 0           | 122.6 | 3     | IIIc  |
| 0         | LAA18, 187    | Serous  | 0.037859645 | 185   | 3     | IIIc  |
| 1         | LAA19, 193    | Serous  | 0.023074048 | 568.7 | 3     | IIIc  |
| 0         | LAA22, 201    | Serous  | 0           | 130.4 | 2     | IIIc  |
| 1         | LAA23, 203    | Serous  | 0.081115207 | 133   | 3     | IIIc  |
| 0         | LAA25, 142    | Serous  | 0           | 2089  | 3     | IV    |
| 3         | LAA26, 213    | Serous  | 0.353647098 | 743.6 | 3     | IIIA  |
| 0         | LAA27, 214    | Serous  | 0.041931778 | 9     | 3     | IIIc  |
| 0         | LAA28, 216    | Serous  | 0           | 173   | 3     | IIIc  |
| 3         | LAA29, 217    | Serous  | 0.425992424 | 180.1 | 3     | IIIc  |
| 0         | LAA30, 218    | Serous  | 0.015484848 | 246.3 | 3     | IIIc  |
| 1         | LAA32, 228    | Serous  | 0.057685636 | 83    | 3     | IIIc  |
| 2         | LAA33, 229    | Serous  | 0.576730297 | 269.5 | 3     | IIIc  |
| 2         | LAA34, 231    | Serous  | 0.487077965 | 3624  | 3     | IIIc  |
| 0         | LAA35, 234    | Serous  | 0.03525     | 528   | 3     | IIIc  |
| 1         | LAA40, 151    | Serous  | 0.032555489 | 846   | 3     | IIIc  |
| 2         | LAA76         | Serous  | 0.410678392 | 186.3 | 3     | IIIc  |
| 0         | LAA82         | Serous  | 0           | 344.4 | 3     | IIIc  |
| 3         | LAA85         | Serous  | 2.187146474 | 988   | 2     | IV    |
| 1         | LAA95         | Serous  | 0           | 989.5 | 2     | IIIc  |
| 2         | LAA103        | Serous  | 1.304360978 | 9603  | 3     | IV    |
| 0         | LAA107        | Serous  | 0.909100076 | 2301  | 3     | IIIc  |
| 0         | LAA123        | Serous  | 0           | 76.1  | 2     | IIIc  |
| 3         | LAA128        | Serous  | 0.639591175 | 1807  | 3     | IV    |
| 2         | LAA130        | Serous  | 0.430984762 | 765   | 3     | IIIc  |
| 0         | LAA131        | Serous  | 0           | 2537  | 3     | IIIc  |
| 0         | LAA133        | Serous  | 0.025217194 | 84    | 3     | IV    |
| 3         | LAA139        | Serous  | 1.948097437 | 228   | 3     | IIIc  |
| 0         | LAA158        | Serous  | 0.331790441 | 612.4 | 3     | IIC   |
| 2         | LAA166        | Serous  | 0.356001294 | 158.7 | 3     | IIIc  |
| 1         | LAA180        | Serous  | 0.662772761 | 284   | 3     | IIIc  |
| 0         | LAA185, 385   | Serous  | 0.032973389 | 267   | 1     | IV    |
| 3         | LAA186        | Serous  | 2.028021766 | 1675  | 3     | IA    |
| 2         | LAA196        | Serous  | 0.231969163 | 4369  | 3     | IIC   |
| 0         | LAA202        | Serous  | 0.027883472 | 99.4  | 3     | IIIc  |
| 3         | LAA202        | Serous  | 0.027883472 | 99.4  | 3     | IIIc  |
| 2         | LAA 632       | Serous  | 0.730286025 | 3914  | 3     | IIIc  |

|   |        |              |             |       |     |      |
|---|--------|--------------|-------------|-------|-----|------|
| 0 | LAA410 | Clear Cell   | 0.135443038 | 520   | N/A | IIC  |
| 1 | LAA414 | Clear Cell   | 0.088970758 | 783.8 | 3   | IIC  |
| 2 | LAA415 | Clear Cell   | 0.127653696 | 108.3 | 3   | IIIA |
| 0 | LAA418 | Clear Cell   | 0.273359429 | 125   | 2   | IIC  |
| 3 | LAA419 | Clear Cell   | 0.125504643 | 348   | N/A | IIC  |
| 2 | LAA421 | Clear Cell   | 0.166336634 | 542.6 | 3   | IIIA |
| 0 | LAA425 | Clear Cell   | 0.136249904 | 50    | 3   | IC   |
| 1 | LAA427 | Clear Cell   | 0.079350833 | 51.9  | 3   | IC   |
| 0 | LAA429 | Clear Cell   | 0.340038114 | 1112  | 3   | IV   |
| 1 | LAA430 | Clear Cell   | 0.092260404 | 133   | 3   | IIB  |
| 1 | LAA432 | Clear Cell   | 0.099145509 | 446   | 3   | IIC  |
| 0 | LAA433 | Mucinous     | 0.115668203 | 207.6 | 2   | IIC  |
| 1 | LAA441 | Mucinous     | 0.104147465 | 31    | 1   | IA   |
| 1 | LAA443 | Mucinous     | 0.049308756 | 15.1  | 2   | IA   |
| 2 | LAA446 | Mucinous     | 0.121198157 | 13    | 1   | IC   |
| 1 | LAA447 | Mucinous     | 0.455379747 | 612   | 2   | IA   |
| 1 | LAA448 | Mucinous     | 0.103270042 | 34.8  | 2   | IA   |
| 2 | LAA449 | Mucinous     | 0.131751055 | 75    | 1   | IA   |
| 1 | LAA453 | Mucinous     | 0.149156118 | 12    | 1   | IA   |
| 1 | LAA478 | Endometrioid | 0.079774855 | 13.9  | 1   | IIA  |
| 1 | LAA482 | Endometrioid | 0.093309081 | 13.5  | 2   | IB   |
